# Supplementary material for: Deregulation of Genes Related to Iron and Mitochondrial Metabolism in Refractory Anemia with Ring Sideroblasts
Source: PubMed Central journal article supplement (PMC4425562; doi:10.1371/journal.pone.0126555), 2015-05-08

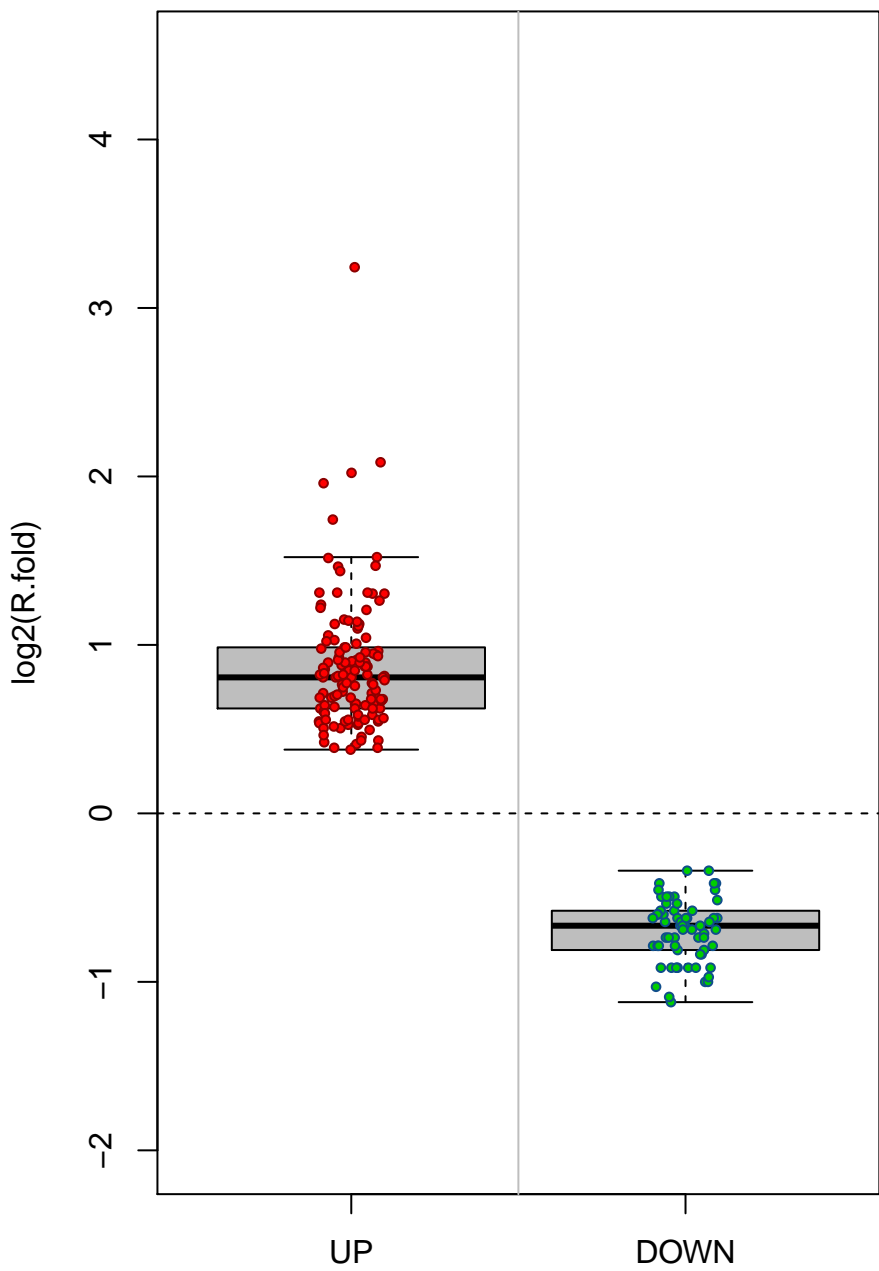

Supplement: pone.0126555.s002.pdf [file pone.0126555.s002.pdf]
