# Supplementary material for: Deregulation of Genes Related to Iron and Mitochondrial Metabolism in Refractory Anemia with Ring Sideroblasts
Source: PLoS One. 2015 May 8;10(5):e0126555. doi: 10.1371/journal.pone.0126555 (PMC4425562; doi:10.1371/journal.pone.0126555)
Supplement: S5 Table — (XLSX) [file pone.0126555.s009.xlsx]

## Sheet: Hoja1
	S5 Table. Over-expressed and under-expressed genes in RARS patients respect to the RCUD group
	Ensembl GENE	GENE ID	d Value	p Value	q Value	R. fold
	ENSG00000130513	GDF15	5.23902	0	0	9.45913
	ENSG00000136628	EPRS	4.78552	0	0	2.183
	ENSG00000123975	CKS2	4.50792	0	0	2.46696
	ENSG00000144485	HES6	4.47104	0	0	3.34644
	ENSG00000107242	PIP5K1B	4.43153	0	0	2.87187
	ENSG00000039068	CDH1	4.29963	1.1409e-06	0.000187754	2.01302
	ENSG00000081181	ARG2	4.26423	1.1409e-06	0.000187754	4.06285
	ENSG00000178752	AC016757.10	4.2634	1.1409e-06	0.000187754	4.24482
	ENSG00000070669	ASNS	4.17028	1.1409e-06	0.000187754	3.88776
	ENSG00000162599	NFIA	4.1288	3.4227e-06	0.000414163	2.77309
	ENSG00000211584	AC004466.1	4.12186	3.4227e-06	0.000414163	2.13802
	ENSG00000132570	PCBD2	4.11426	3.4227e-06	0.000414163	2.08003
	ENSG00000071967	CYBRD1	3.98255	5.70451e-06	0.000558792	1.94854
	ENSG00000131747	AC080112.15	3.90227	5.70451e-06	0.000558792	2.47945
	ENSG00000006125	AP2B1	3.71662	1.36908e-05	0.000954682	1.91589
	ENSG00000111665	CDCA3	3.71101	1.36908e-05	0.000954682	1.93334
	ENSG00000128059	PPAT	3.63249	1.71135e-05	0.0010204	1.77444
	ENSG00000115107	STEAP3	3.61305	2.16771e-05	0.00123866	1.84434
	ENSG00000071794	HLTF	3.59059	2.85225e-05	0.00152398	2.35532
	ENSG00000168078	PBK	3.55388	3.19452e-05	0.00160278	2.85672
	ENSG00000135776	ABCB10	3.52401	3.65088e-05	0.00172647	2.39983
	ENSG00000063241	ISOC2	3.51263	3.99315e-05	0.00182539	1.70991
	ENSG00000120053	GOT1	3.46662	4.79179e-05	0.00201753	1.87872
	ENSG00000086289	EPDR1	3.4582	4.90588e-05	0.00201753	2.75633
	ENSG00000106105	GARS	3.45273	5.13406e-05	0.00201753	1.97577
	ENSG00000135972	MRPS9	3.40747	5.59042e-05	0.00201753	1.83121
	ENSG00000104147	OIP5	3.39912	5.93269e-05	0.00208616	2.04357
	ENSG00000070367	EXOC5	3.37737	6.61723e-05	0.0022687	1.70417
	ENSG00000175449	RFESD	3.3552	7.75813e-05	0.00253319	2.71235
	ENSG00000133026	MYH10	3.33863	8.32858e-05	0.00253816	2.21721
	ENSG00000145386	CCNA2	3.33706	8.32858e-05	0.00253816	1.87223
	ENSG00000100889	PCK2	3.33192	8.55676e-05	0.00258852	2.4778
	ENSG00000121211	MND1	3.27034	0.000102681	0.00268642	1.79782
	ENSG00000155959	VBP1	3.25048	0.000111808	0.00282207	1.54895
	ENSG00000144959	AADACL1	3.24711	0.000111808	0.00282207	2.4716
	ENSG00000128944	C15orf23	3.24251	0.000115231	0.00287321	1.59549
	ENSG00000121621	KIF18A	3.21661	0.000124358	0.0029574	1.81459
	ENSG00000090861	AARS	3.1978	0.000143754	0.00324959	1.97161
	ENSG00000203805	PPAPDC1A	3.18695	0.000149458	0.00334182	2.30741
	ENSG00000144381	HSPD1	3.16569	0.00016429	0.00348483	1.63108
	ENSG00000196305	IARS	3.1229	0.000191671	0.00377305	1.8617
	ENSG00000144468	RHBDD1	3.10954	0.000205362	0.00391154	1.64179
	ENSG00000090889	KIF4A	3.10464	0.000208785	0.00392226	1.7534
	ENSG00000091164	TXNL1	3.09302	0.000219053	0.00405955	1.46247
	ENSG00000110888	CAPRIN2	3.02092	0.000301198	0.00467614	2.06224
	ENSG00000112077	RHAG	2.99963	0.000337707	0.00497884	2.16344
	ENSG00000080819	CPOX	2.99603	0.000343411	0.00502793	2.47888
	ENSG00000075239	ACAT1	2.98033	0.000370793	0.00527255	1.56629
	ENSG00000101773	RBBP8	2.94511	0.000413006	0.00553477	1.4424
	ENSG00000080824	HSP90AA2	2.92202	0.000451797	0.00574493	1.45048
	ENSG00000163170	BOLA3	2.8567	0.00059441	0.00653876	1.86112
	ENSG00000066735	KIF26A	2.82718	0.000662864	0.00683491	1.82953
	ENSG00000087586	AURKA	2.81762	0.000692527	0.00698326	1.75642
	ENSG00000134057	CCNB1	2.81503	0.000699373	0.00700081	1.75147
	ENSG00000104522	TSTA3	2.81115	0.0007085	0.00704078	1.83233
	ENSG00000123191	ATP7B	2.80524	0.000719909	0.00711394	1.93871
	ENSG00000133488	SEC14L4	2.79471	0.000754136	0.00733345	1.74895
	ENSG00000152556	PFKM	2.74964	0.000891044	0.00799279	1.91184
	ENSG00000148218	ALAD	2.71987	0.000998289	0.00862841	1.86354
	ENSG00000134709	HOOK1	2.70812	0.00103594	0.00881552	1.65002
	ENSG00000104903	LYL1	2.70757	0.00103708	0.00881552	1.57368
	ENSG00000107130	FREQ	2.70277	0.00105191	0.00885017	1.4882
	ENSG00000198959	TGM2	2.70225	0.00105191	0.00885017	1.85576
	ENSG00000101003	GINS1	2.6806	0.00114889	0.00925911	1.89925
	ENSG00000184575	XPOT	2.6641	0.00121164	0.0095672	1.42369
	ENSG00000184831	APOO	2.65864	0.00123331	0.00959986	1.54393
	ENSG00000183597	C22orf25	2.62526	0.00140673	0.0103164	1.8245
	ENSG00000111843	TMEM14C	2.60426	0.00153109	0.0109741	1.57364
	ENSG00000114054	PCCB	2.59855	0.00156418	0.0110652	1.6096
	ENSG00000065328	MCM10	2.59724	0.00156874	0.0110675	1.66039
	ENSG00000101935	AMMECR1	2.57836	0.00168283	0.0115199	1.8833
	ENSG00000109255	NMU	2.56926	0.00172276	0.0115588	2.32831
	ENSG00000077152	UBE2T	2.56429	0.00175699	0.0116821	1.77359
	ENSG00000170312	CDC2	2.55857	0.00179692	0.0117346	1.67622
	ENSG00000090013	BLVRB	2.5409	0.00191671	0.012204	1.93705
	ENSG00000107789	MINPP1	2.5352	0.00194752	0.0122586	2.17863
	ENSG00000151287	C13orf27	2.53422	0.00195893	0.0122812	1.49809
	ENSG00000143224	PPOX	2.53364	0.00196463	0.0122839	2.02607
	ENSG00000115758	ODC1	2.52511	0.00202396	0.0125216	1.54455
	ENSG00000204899	RP11-11C5.2	2.50624	0.00216543	0.0130005	1.51693
	ENSG00000111450	STX2	2.50527	0.00217114	0.013002	1.76047
	ENSG00000188690	UROS	2.50199	0.00219281	0.0130626	1.77859
	ENSG00000151503	NCAPD3	2.49012	0.00228408	0.0133481	1.42554
	ENSG00000164818	HEATR2	2.4887	0.00229321	0.0133635	1.53972
	ENSG00000154917	RAB6B	2.46757	0.00248945	0.0141594	1.60584
	ENSG00000105205	CLC	2.44955	0.00266971	0.0147036	2.20497
	ENSG00000088325	TPX2	2.44571	0.00269823	0.0147619	1.58799
	ENSG00000163029	SMC6	2.39063	0.00325271	0.0160843	1.44483
	ENSG00000087842	PIR	2.37545	0.00341814	0.0165056	1.75052
	ENSG00000072274	TFRC	2.37522	0.00341814	0.0165056	1.60406
	ENSG00000105610	KLF1	2.36564	0.00353908	0.0168296	2.20924
	ENSG00000214706	IFRD2	2.36	0.00360183	0.0169548	1.46038
	ENSG00000149397	HMBS	2.34365	0.00378323	0.0171711	1.98465
	ENSG00000147642	AC079061.8	2.33266	0.00395094	0.0175918	1.76857
	ENSG00000114346	ECT2	2.31645	0.00414718	0.0178898	1.56437
	ENSG00000117399	CDC20	2.26806	0.00492983	0.0199997	1.55664
	ENSG00000126602	TRAP1	2.26281	0.00503822	0.0201831	1.46308
	ENSG00000136824	SMC2	2.20782	0.00599201	0.0220912	1.4982
	ENSG00000102145	GATA1	2.20638	0.0060251	0.0220912	1.64473
	ENSG00000115233	PSMD14	2.1864	0.00646549	0.0232112	1.34965
	ENSG00000184661	CDCA2	2.17022	0.00679064	0.0236561	1.45216
	ENSG00000130560	UBAC1	2.13282	0.00771249	0.0255684	1.6983
	ENSG00000148288	GBGT1	2.09917	0.00862635	0.0271169	1.53628
	ENSG00000100304	TTLL12	2.05874	0.00981631	0.0291168	1.4151
	ENSG00000198876	WDR40A	2.03294	0.01064	0.0304627	1.90062
	ENSG00000149136	SSRP1	2.02517	0.0108785	0.0306968	1.30532
	ENSG00000149150	SLC43A1	2.02006	0.0110542	0.030936	1.71025
	ENSG00000126088	UROD	2.01737	0.0111409	0.0309826	1.69475
	ENSG00000166927	MS4A7	2.00968	0.0114056	0.0314086	1.80071
	ENSG00000119705	C14orf156	1.99387	0.0120057	0.0323255	1.34267
	ENSG00000162063	CCNF	1.99226	0.0120525	0.0323456	1.46637
	ENSG00000144659	SLC25A38	1.98926	0.0121928	0.0325349	1.47244
	ENSG00000163864	NMNAT3	1.9848	0.0123913	0.0328903	1.37
	ENSG00000115641	FHL2	1.96676	0.0131375	0.0341654	1.62371
	ENSG00000013583	HEBP1	1.94416	0.0141666	0.0358448	1.41335
	ENSG00000104889	RNASEH2A	1.92338	0.0151626	0.0372456	1.51151
	ENSG00000173207	CKS1B	1.90181	0.0162008	0.0387967	1.32874
	ENSG00000141562	NARF	1.89022	0.0168089	0.0396795	1.38099
	ENSG00000166965	RCCD1	1.87944	0.0173965	0.0405047	1.47286
	ENSG00000055118	KCNH2	1.86607	0.018105	0.0413132	1.63054
	ENSG00000079999	KEAP1	1.83054	0.0201597	0.0440236	1.30707
	ENSG00000164062	APEH	1.78947	0.0228853	0.0474995	1.46899
	ENSG00000187997	AC021593.15	1.78581	0.0231535	0.0477738	1.60445
	ENSG00000103200	NME4	1.78084	0.0235094	0.0482161	1.34653
	ENSG00000048140	TSPAN17	1.77989	0.023579	0.0483107	1.60844
	ENSG00000165501	PPIL5	1.7642	0.0247484	0.0497893	1.30005
	ENSG00000144647	C3orf39	1.74312	0.0264769	0.051921	1.4776
	ENSG00000136840	ST6GALNAC4	1.74015	0.0267233	0.0521804	1.72753
	ENSG00000129518	EAPP	-1.80644	0.0217661	0.0462071	0.745152
	ENSG00000147119	CHST7	-1.84089	0.0195767	0.0433487	0.64924
	ENSG00000134900	TPP2	-1.86119	0.0183982	0.0417375	0.790098
	ENSG00000069493	CLEC2D	-1.86656	0.0180719	0.0413132	0.636139
	ENSG00000134285	FKBP11	-1.88049	0.0173417	0.040423	0.659644
	ENSG00000119729	RHOQ	-1.93446	0.0146366	0.0364512	0.713019
	ENSG00000138378	STAT4	-1.9648	0.0132265	0.0343534	0.50492
	ENSG00000181045	SLC26A11	-1.98406	0.0124324	0.0329325	0.647977
	ENSG00000113971	ACAD11	-2.02737	0.0108055	0.0305746	0.731682
	ENSG00000146232	NFKBIE	-2.03071	0.0107131	0.0305618	0.713222
	ENSG00000136114	THSD1	-2.03171	0.0106754	0.0305035	0.665469
	ENSG00000094841	UPRT	-2.03356	0.0106241	0.0304381	0.674099
	ENSG00000166224	SGPL1	-2.04912	0.0100856	0.0294909	0.786668
	ENSG00000139211	AMIGO2	-2.05436	0.0099441	0.0292853	0.584761
	ENSG00000027697	IFNGR1	-2.07013	0.00947176	0.0285483	0.584398
	ENSG00000101445	PPP1R16B	-2.11116	0.00826013	0.0264815	0.459779
	ENSG00000020633	RUNX3	-2.13112	0.00776041	0.0256299	0.604163
	ENSG00000185404	AC009949.9	-2.16507	0.00690473	0.0239233	0.646364
	ENSG00000196757	ZNF700	-2.17877	0.00662521	0.0234209	0.628834
	ENSG00000184515	BEX5	-2.24718	0.00527667	0.0204996	0.583578
	ENSG00000145730	PAM	-2.25353	0.00518654	0.0204765	0.533782
	ENSG00000162734	PEA15	-2.28439	0.00465031	0.0192231	0.75266
	ENSG00000141258	RUTBC1	-2.29791	0.00441187	0.0185975	0.750171
	ENSG00000078237	C12orf5	-2.31474	0.00416885	0.0179595	0.600127
	ENSG00000145391	SETD7	-2.34773	0.00373531	0.0171711	0.596849
	ENSG00000182158	CREB3L2	-2.36769	0.00350827	0.0167498	0.709363
	ENSG00000119541	VPS4B	-2.36831	0.00349686	0.0167498	0.686961
	ENSG00000134444	KIAA1468	-2.37376	0.00343754	0.0165798	0.655384
	ENSG00000110852	CLEC2B	-2.43013	0.00284997	0.0151093	0.573369
	ENSG00000130714	POMT1	-2.43028	0.00284997	0.0151093	0.620414
	ENSG00000187239	FNBP1	-2.44495	0.0027085	0.0147984	0.725267
	ENSG00000165233	C9orf89	-2.48142	0.00236167	0.0136465	0.607676
	ENSG00000120370	SCYL1BP1	-2.49659	0.0022316	0.0131603	0.527828
	ENSG00000162909	CAPN2	-2.49727	0.00222704	0.0131603	0.56422
	ENSG00000127452	FBXL12	-2.53445	0.00195779	0.0122812	0.709986
	ENSG00000153790	C7orf31	-2.56269	0.00176497	0.0116821	0.577658
	ENSG00000110031	LPXN	-2.5902	0.00161438	0.0113341	0.569293
	ENSG00000169991	AL080251.23	-2.63969	0.00132687	0.00996159	0.649132
	ENSG00000100422	CERK	-2.65775	0.00123674	0.00959986	0.575564
	ENSG00000197892	KIF13B	-2.72079	0.000994866	0.00861693	0.688581
	ENSG00000083799	CYLD	-2.75034	0.000888762	0.00799279	0.62618
	ENSG00000176853	FAM91A1	-2.77392	0.000811181	0.00755879	0.639938
	ENSG00000133142	TCEAL4	-2.78422	0.000782658	0.00745366	0.641121
	ENSG00000135597	REPS1	-2.80258	0.000727895	0.00714136	0.619847
	ENSG00000122335	SERAC1	-2.81649	0.00069595	0.00698354	0.702096
	ENSG00000197747	S100A10	-2.8168	0.00069595	0.00698354	0.530408
	ENSG00000125821	HARS2	-2.88172	0.000547633	0.00631106	0.648333
	ENSG00000181368	AC010441.6	-2.96135	0.000389047	0.00540745	0.530071
	ENSG00000171603	CLSTN1	-2.99541	0.000345693	0.0050434	0.631924
	ENSG00000113296	THBS4	-3.01299	0.000317171	0.0048509	0.488659
	ENSG00000143157	POGK	-3.01743	0.000302339	0.00467621	0.534149
	ENSG00000105404	RABAC1	-3.08787	0.000224758	0.00410973	0.559277
	ENSG00000131378	RFTN1	-3.16229	0.000165431	0.00348483	0.495558
	ENSG00000165801	AL161668.6	-3.2043	0.000134626	0.00312924	0.668063
	ENSG00000063587	ZNF275	-3.21702	0.000124358	0.0029574	0.655013
	ENSG00000082512	TRAF5	-3.28733	9.81175e-05	0.00268642	0.534441
	ENSG00000070444	MNT	-3.28761	9.81175e-05	0.00268642	0.647681
	ENSG00000198945	L3MBTL3	-3.3063	9.58357e-05	0.00268642	0.529323
	ENSG00000196954	CASP4	-3.4388	5.24815e-05	0.00201753	0.511262
	ENSG00000181481	RNF135	-3.46052	4.90588e-05	0.00201753	0.472012
	ENSG00000141504	2009-06-02	-3.50299	4.44952e-05	0.00194745	0.595629
	ENSG00000100445	C14orf124	-3.66163	1.59726e-05	0.0010204	0.62527
	ENSG00000173230	GOLGB1	-3.71354	1.36908e-05	0.000954682	0.624327
	ENSG00000133511	PI4KA	-3.90309	5.70451e-06	0.000558792	0.600149
